# Supplementary material for: Cervicovaginal Fungi and Bacteria Associated With Cervical Intraepithelial Neoplasia and High-Risk Human Papillomavirus Infections in a Hispanic Population
Source: Front Microbiol. 2018 Oct 23;9:2533. doi: 10.3389/fmicb.2018.02533 (PMC6208322; doi:10.3389/fmicb.2018.02533)
Supplement: Supplementary file 5 [file Table_5.xlsx]

## Sheet: Suppl Table 5
Supplementary Table 5. Unadjusted and adjusted p-values for all diversity comparisons between cervicovaginal samples in this study
PERMANOVA PCoA Statistical test for difference in group centroid position for BACTERIA (Figure 2A)
comparison	Df	Sum Sq	MeanSqs	F Value	R2	p.value
Sampling_Site	2	10.5018	5.2509	15.972	0.1574	0.001
Anus-Posterior_fornix	1	7.9511	7.9511	24.872	0.1804	0.001
Anus-Introitus	1	7.7068	7.7068	23.918	0.17217	0.001
PERMANOVA PCoA Statistical test for difference in group centroid position for Fungi (Figure 2B)
comparison	Df	Sum Sq	MeanSqs	F Value	R2	p.value
Sampling_Site	2	0.529	0.264	0.694	0.00819	0.662
Anus-Posterior_fornix	1	0.33	0.33	0.876	0.00783	0.545
Anus-Introitus	1	0.225	0.225	0.58	0.00515	0.746
Anova analyses testing richness introitus (Supplementary Figure 4A)
comparison	Df	Sum Sq	MeanSqs	F Value	Pr(>F)
HPV_Status	1	8301	8301	2.699	0.1059
Residuals	57	175294	3075	NA	NA
Anova analyses testing richness cervix (Supplementary Figure 4A)
comparison	Df	Sum Sq	MeanSqs	F Value	Pr(>F)
HPV_Status	1	8655	8655	2.607	0.1121
Residuals	55	182583	3320	NA	NA
Anova analyses testing richness cervix (Supplementary Figure 4B)
comparison	Df	Sum Sq	MeanSqs	F Value	Pr(>F)
Biopsy	2	5938	2969	1.166	0.321
CIN3-CIN1	1	5219	5219	2.485	0.1228
No Lesion-CIN1	1	2865	2865	1.124	0.3031
No Lesion-CIN3	1	80.78	80.78	0.02575	0.8736
Anova analyses testing richness cervix (Supplementary Figure 4B)
comparison	Df	Sum Sq	MeanSqs	F Value	Pr(>F)
Biopsy	1	9979	9979	2.13	0.1617
CIN3-CIN1	1	9877	9877	5.033	0.03095
No Lesion-CIN1	2	13803	6902	1.961	0.1533
No Lesion-CIN3	1	1173	1173	0.2453	0.6241
PERMANOVA PCoA Statistical test for BACTERIA according to HPV (Suppl Figure 5A)
comparison Introitus	Df	Sum Sq	MeanSqs	F Value	R2	p.value
HPV_Status	1	0.3252	0.3252	0.9496	0.01697	0.393
High_Risk - Low Risk	1	0.3252	0.3252	0.9496	0.01697	0.393
comparison Cervix	Df	Sum Sq	MeanSqs	F Value	R2	p.value
HPV_Status	1	0.4081	0.4081	1.182	0.02031	0.306
High_Risk - Low Risk	1	0.4081	0.4081	1.182	0.02031	0.306
PERMANOVA PCoA Statistical test for BACTERIA according to Biopsy status (Suppl Figure 5B)
comparison Introitus	Df	Sum Sq	MeanSqs	F Value	R2	p.value
Biopsy	2	0.901	0.4505	1.348	0.05775	0.196
No Lesion - CIN3	1	0.5612	0.5612	1.596	0.05051	0.151
No Lesion - CIN1	1	0.1275	0.1275	0.443	0.02402	0.81
CIN3 - CIN1	1	0.5199	0.5199	1.521	0.03664	0.173
comparison Posterior Fornix	Df	Sum Sq	MeanSqs	F Value	R2	p.value
Biopsy	2	0.6953	0.3477	1.031	0.0468	0.416
No Lesion - CIN3	1	0.4483	0.4483	1.284	0.0424	0.251
No Lesion - CIN1	1	0.1223	0.1223	0.3992	0.0217	0.857
CIN3 - CIN1	1	0.3833	0.3833	1.118	0.02932	0.331
Anova analyses testing Shannon Diversity introitus (Figure 4)
comparison	Df	Sum Sq	MeanSqs	F Value	Pr(>F)
CIN3-CIN1	1	3.087	3.087	4.858	0.03334
Biopsy	1	0.6646	0.6646	0.8369	0.3676
No Lesion-CIN1	2	3.257	1.628	2.342	0.108
No Lesion-CIN3	1	0.107	0.107	0.1614	0.6926
Anova analyses testing Shannon Diversity cervix (Figure 4)
comparison	Df	Sum Sq	MeanSqs	F Value	Pr(>F)
CIN3-CIN1	1	3.463	3.463	5.019	0.03117
Biopsy	1	0.5123	0.5123	0.5315	0.4718
No Lesion-CIN1	2	3.518	1.759	2.167	0.1271
No Lesion-CIN3	1	0.3675	0.3675	0.4504	0.5107
Non-parametric differential abundance rank sum test for bacterial cervical biomarkers (Suppl Figure 6)
Taxon	statistic	p.value	Fdr adj. p.value	comparison
Firmicutes -Tissierella_praeacuta	403	0.03492	0.5902	High_Risk- low risk
Actinobacteria Gardnerella_vaginalis	31.5	0.0763	0.7125	NoLesion-CIN3
Firmicutes Lactobacillus_kitasatonis	368	0.02312	0.3699	High_Risk-Low_Risk
Bacteroidetes Prevotella_timonensis	99	0.04769	0.4521	CIN1-CIN3
PERMANOVA PCoA Statistical test for difference in group centroid position for fungi (Figure 6)
Dominance	Df	Sum Sq	MeanSqs	F.Model	R2	p.value
Ascomycota Candida - Other	1	9.28	9.28	31	0.217	0.001
Ascomycota Candida - Basidiomycota Malassezia	1	8.55	8.55	94.4	0.612	0.001
Ascomycota Candida - Basidiomycota Sporidiolobaceae	1	15.67	15.67	216.7	0.716	0.001
Other - Basidiomycota Malassezia	1	4.15	4.15	11.4	0.115	0.001
Other- Basidiomycota Sporidiolobaceae	1	10.8	10.8	37.5	0.248	0.001
Basidiomycota Malassezia-Basidiomycota Sporidiolobaceae	1	9.85	9.85	128.9	0.675	0.001
Anova analyses testing fungal Shannon diversity in cervical samples (Figure 7A)
Comparison	Df	Sum Sq	MeanSqs	F Value	Pr(>F)
HPV_Status	1	1.45	1.451	4	0.05
Anova analyses testing fungal Shannon diversity in cervical samples (Figure 7B)
comparison	Df	SumsOfSqs	MeanSqs	F.value	Pr(>F)
Cytology	3	2.313	0.771	1.864	0.1461
NSIL-ASCUS	1	1.781	1.781	5.424	0.0448
HGSIL-ASCUS	1	1.218	1.218	3.486	0.07
LGSIL-NSIL	1	1.095	1.095	2.069	0.1658
HGSIL-NSIL	1	0.588	0.588	1.796	0.19
LGSIL-HGSIL	1	0.401	0.401	0.933	0.3391
LGSIL-ASCUS	1	0.362	0.362	0.695	0.4123
Anova analyses of fungal richness in the introitus (Suppl Figure 9A)
comparison	Df	SumsOfSqs	MeanSqs	F.value	Pr(>F)
Biopsy	2	0.6	0.298	0.61	0.55
HPV_Status	1	0.16	0.16	0.33	0.57
Biopsy:HPV_Status	2	0.21	0.106	0.22	0.81
Residuals	42	20.57	0.49
Anova analyses testing fungal richness in cervix (Suppl figure 9B)
comparison	Df	SumsOfSqs	MeanSqs	F.value	Pr(>F)
Biopsy	2	646	323	1.02	0.37
HPV_Status	1	266	266	0.84	0.36
Biopsy:HPV_Status	2	261	131	0.41	0.66
Residuals	42	13263	316	3.6
Non-parametric differential Fungal Biomarkers introitus (Figure 8A)
Taxon	statistic	p.value	Fdr adj. p.value	comparison
Ascomycota Saccharomyces	126	0.006992	0.02098	ASCUS-LGSIL
Basidiomycota Sporidiobolaceae	134	0.001183	0.007097	ASCUS-LGSIL
Basidiomycota Malassezia	173	0.01656	0.04968	Low_Risk-High_Risk
Basidiomycota Sporidiobolaceae	455	0.006433	0.0386	Low_Risk-High_Risk
Non-parametric differential Fungal Biomarkers cervix (Figure 8B)
Taxon	statistic	p.value	Fdr adj. p.value	comparison
Basidiomycota Sporidiobolaceae	129	0.003614	0.02169	ASCUS-LGSIL
Basidiomycota Malassezia	137.5	0.002651	0.007953	Low_Risk-High_Risk
Basidiomycota Sporidiobolaceae	476	0.001671	0.007953	Low_Risk-High_Risk
